# Supplementary material
Source: Springer Nature journal article supplement (https://www.springermedizin.de/resource/supplementary/12889_2013_6400_MOESM8_ESM.pdf/9497628)
Supplement: MOESM8 [file 9497628]

## FV suppliers

### Barriers for delivery:

- Forgetting about the Boost delivery (not yet a routine)
- Responsibilities of suppliers versus schools unclear to suppliers
- Requested delivery time and delivery size inconvenient to FV suppliers
- Difficulties in ordering the requested FV
- Distance to the schools

### Facilitators for delivery:

- Branding opportunities
- Possibility to support a good cause

## Teachers

### Barriers for implementing a FV break:

- Suppliers' timing of FV delivery
- Lack of FV deliverance
- Time demanding practices:
  - Cutting up FV
  - Time for eating FV
  - Cleaning after the FV break
  - Restoring order in class after the FV break
- Pupils' food games with FV
- The social dynamics of teenagers

## Pupils

### Barriers for FV intake:

- Teachers timing of the FV break leading to FV turning brown
- Bruised FV
- Pupils throwing with FV resulting in poor FV quality and reduced FV quantity available to the pupils

### Facilitators for FV intake:

- High quality, large quantity and variety of the delivered FV
- Cut up FV (if eaten before turning brown)
- Eating FV as a shared activity
